# Supplementary material for: One-step method for the self-assembly of metal nanoparticles onto facetted hollow silica tubes
Source: Royal Society of Chemistry journal article supplement (doi:10.1039/b608460e), 2006-01-01
Supplement: b608460e.pdf [file b608460e.pdf]

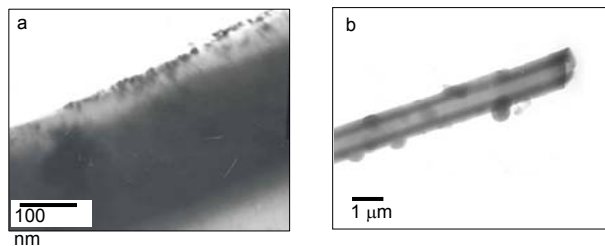

Fig 1. TEM images of citrate-stabilized metal NP anchored onto amine functionalized faceted silica tube (a) Au NP and (b) Ag NP)

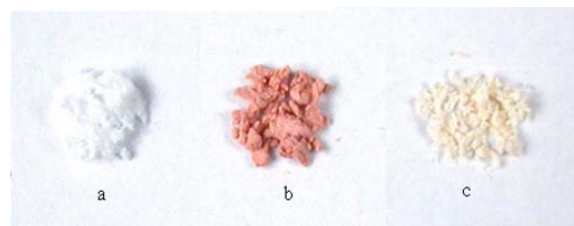

Fig 2. (a) Silica hollow tubes (b) Au-NP silica composite and (c) Ag-NP silica composite samples
